# Supplementary material for: Identification of the Biosynthetic Gene Cluster of New Piperazic Acid-Containing Lipopeptides with Cytotoxic Activity in the Genome of Marine Streptomyces PHM034
Source: MDPI journal article supplement (doi:10.3390/metabo13101091), 2023-10-18
Supplement: s1 [file s1]

# Identification of the Biosynthetic Gene Cluster of New Piperazic Acid-Containing Lipopeptides with Cytotoxic Activity in the Genome of Marine *Streptomyces* PHM034

Ana Ceniceros <sup>1,2</sup>, Librada Cañedo <sup>3</sup>, Carmen Méndez <sup>1,2</sup>, Carlos Olano <sup>1,2</sup>, Carmen Schleissner <sup>4</sup>, Carmen Cuevas <sup>3</sup>, Fernando de la Calle <sup>3</sup> and José A. Salas <sup>1,2,\*</sup>

- <sup>1</sup> Departamento de Biología Funcional e Instituto Universitario de Oncología del Principado de Asturias (IUOPA), Universidad de Oviedo, 33006 Oviedo, Spain; acmedrano@alumni.unav.es (A.C.); cmendezf@uniovi.es (C.M.); olanocarlos@uniovi.es (C.O.)  
<sup>2</sup> Instituto de Investigación Sanitaria del Principado de Asturias, (ISPA), 33006 Oviedo, Spain  
<sup>3</sup> Drug Discovery Area, PharmaMar S.A. Avda. de los Reyes 1, Colmenar Viejo, 28770 Madrid, Spain; lcanedo@pharmamar.com (L.C.); ccuevas@pharmamar.com (C.C.); fdelacalle@pharmamar.com (F.d.l.C.)  
<sup>4</sup> Unolab Manufacturing, Avenida de las Flores 6, Humanes de Madrid, 28970 Madrid, Spain; cschleissner@unolab.es  
\* Correspondence: jasalas@uniovi.es

| Table of contents                                                                                                                         | Pages |
|-------------------------------------------------------------------------------------------------------------------------------------------|-------|
| <b>Figures S1-S6.</b> 1D and 2D NMR spectra of <b>1</b> in CDCl <sub>3</sub> .                                                            | 2-7   |
| <b>Figures S7-S12.</b> 1D and 2D NMR spectra of <b>2</b> in CDCl <sub>3</sub> .                                                           | 8-13  |
| <b>Figures S13-S14.</b> 1D spectra of <b>3</b> in CDCl <sub>3</sub> .                                                                     | 14-15 |
| <b>Figures S15-S17.</b> HRESIMS of <b>1-3</b> .                                                                                           | 16-18 |
| <b>Figure S18</b> PCR check of the mutant strains.                                                                                        | 19    |
| <b>Figure S19</b> HPLC-MS results from the extract of the wild type strain and <i>S. tuius</i> PM13 Dis7                                  | 20    |
| <b>Table S1</b> Clusters predicted by antiSMASH in the genome of <i>S. tuius</i> PHM034                                                   | 21    |
| <b>Table S2.</b> Genes predicted in PM130391, 130392, and 140293 biosynthetic gene cluster and predicted function of the encoded enzymes. | 22-23 |

Figure S1

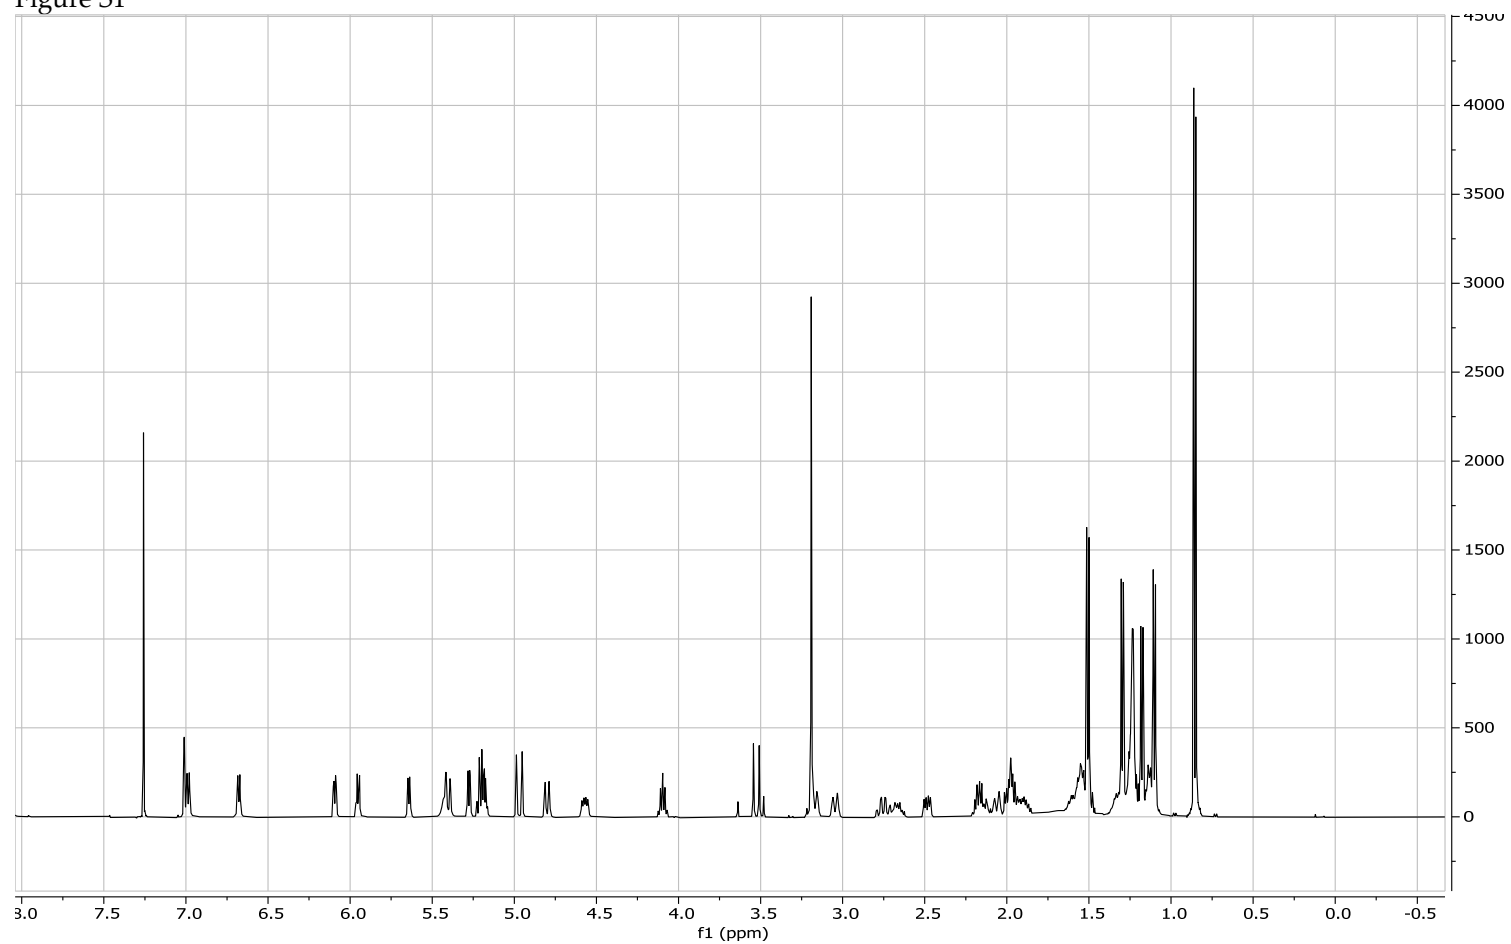

Figure S1.  $^1\text{H}$  NMR (500 MHz) Spectrum of Compound 1 in  $\text{CDCl}_3$

Figure S2

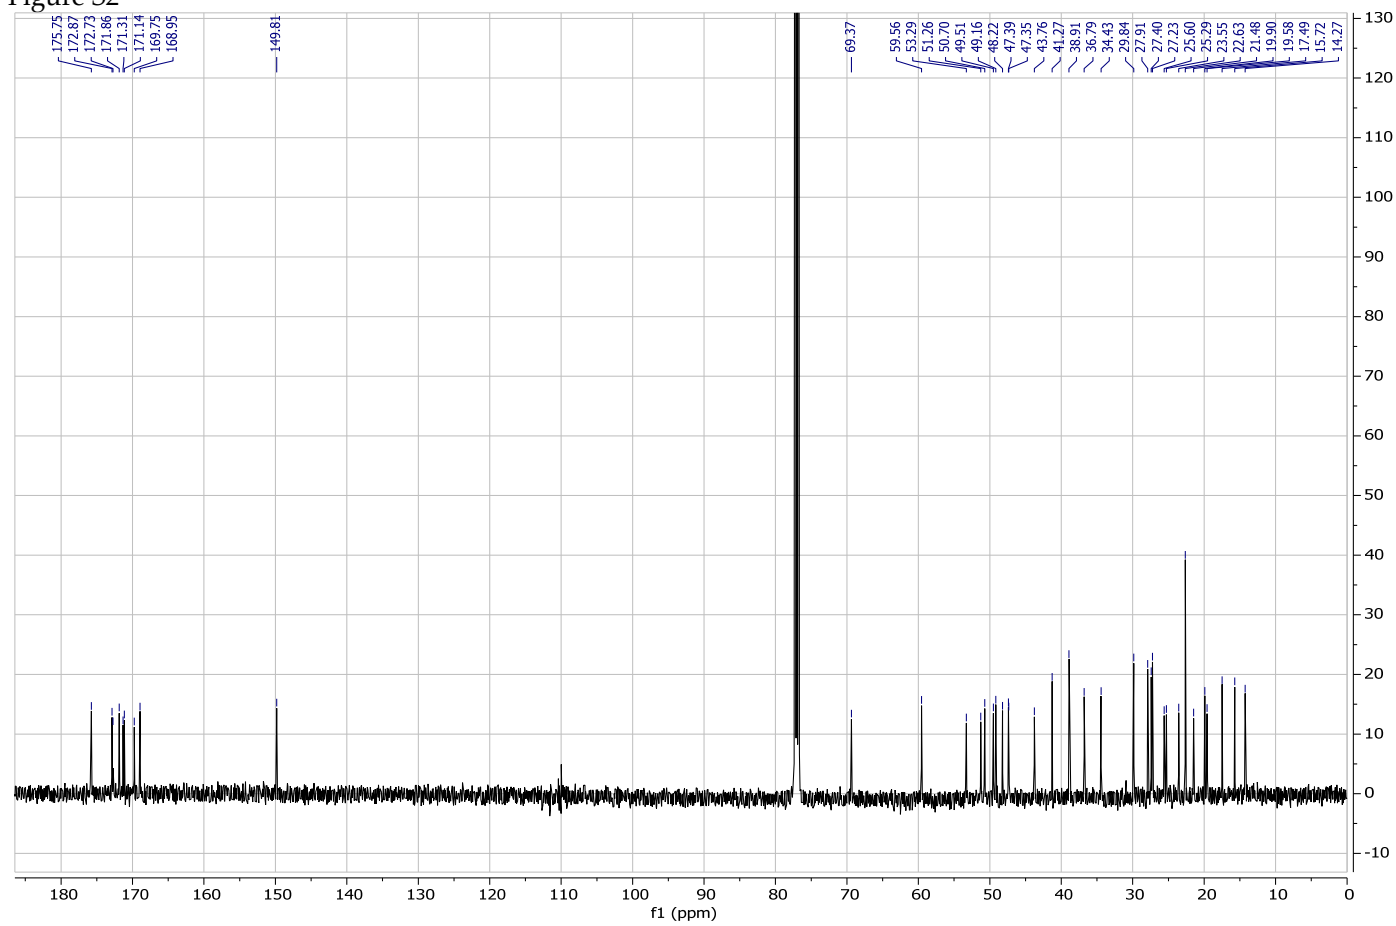

Figure S2. <sup>13</sup>C NMR (100 MHz) Spectrum of Compound 1 in CDCl<sub>3</sub>

Figure S3

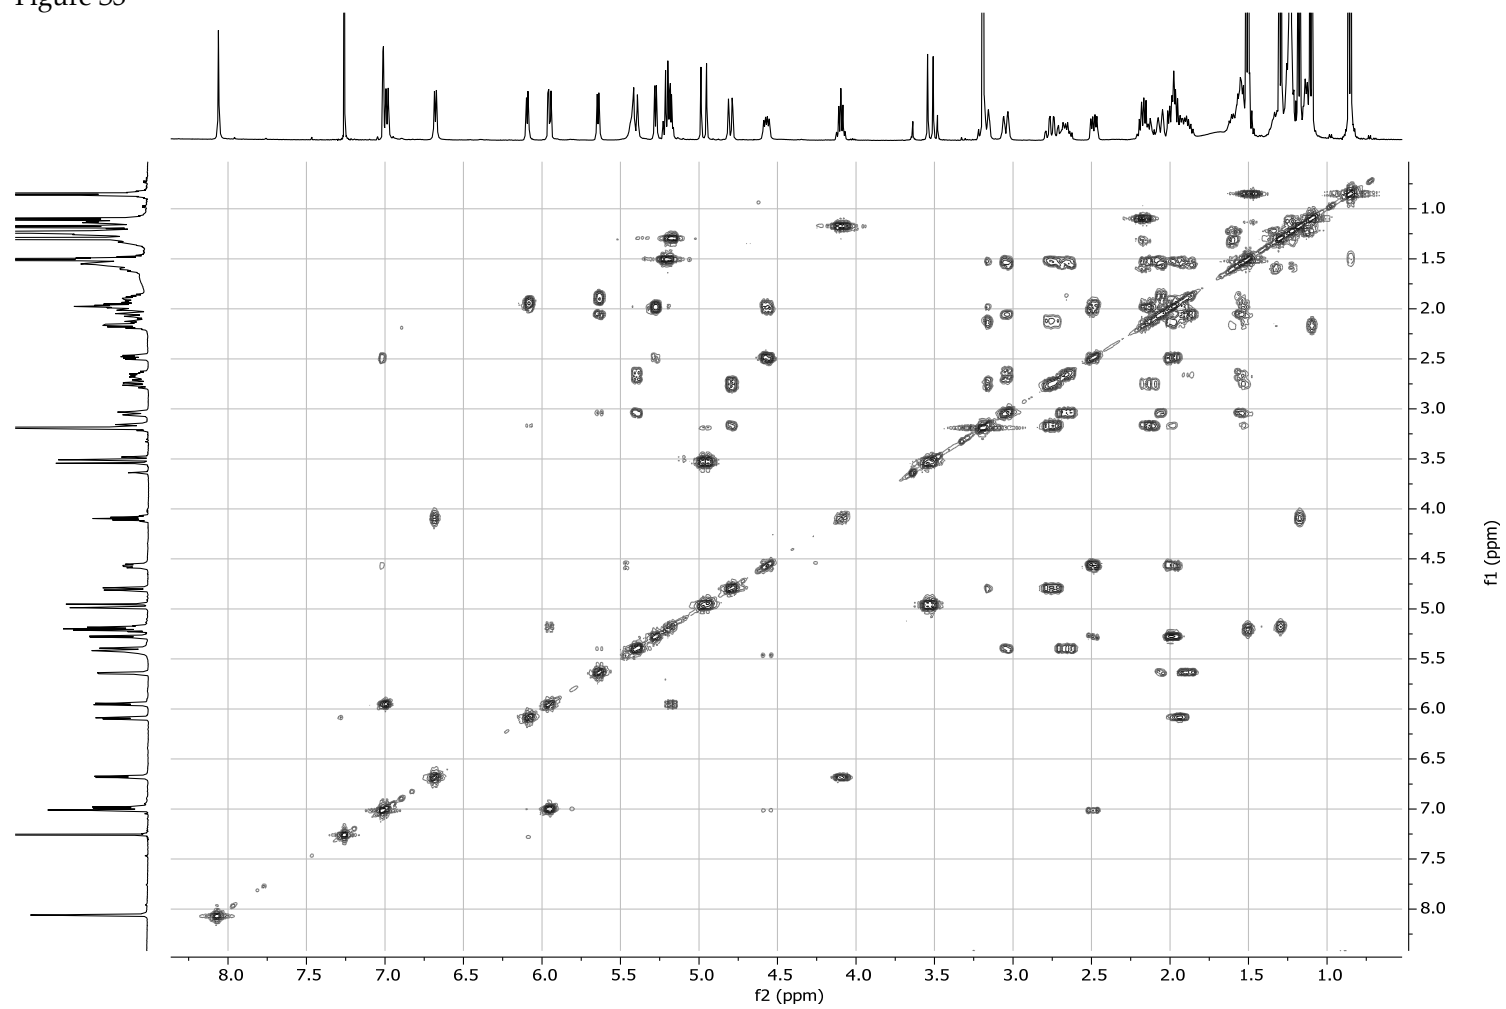

Figure S3. gCOSY (500 MHz) Spectrum Compound 1 in  $\text{CDCl}_3$

Figure S4

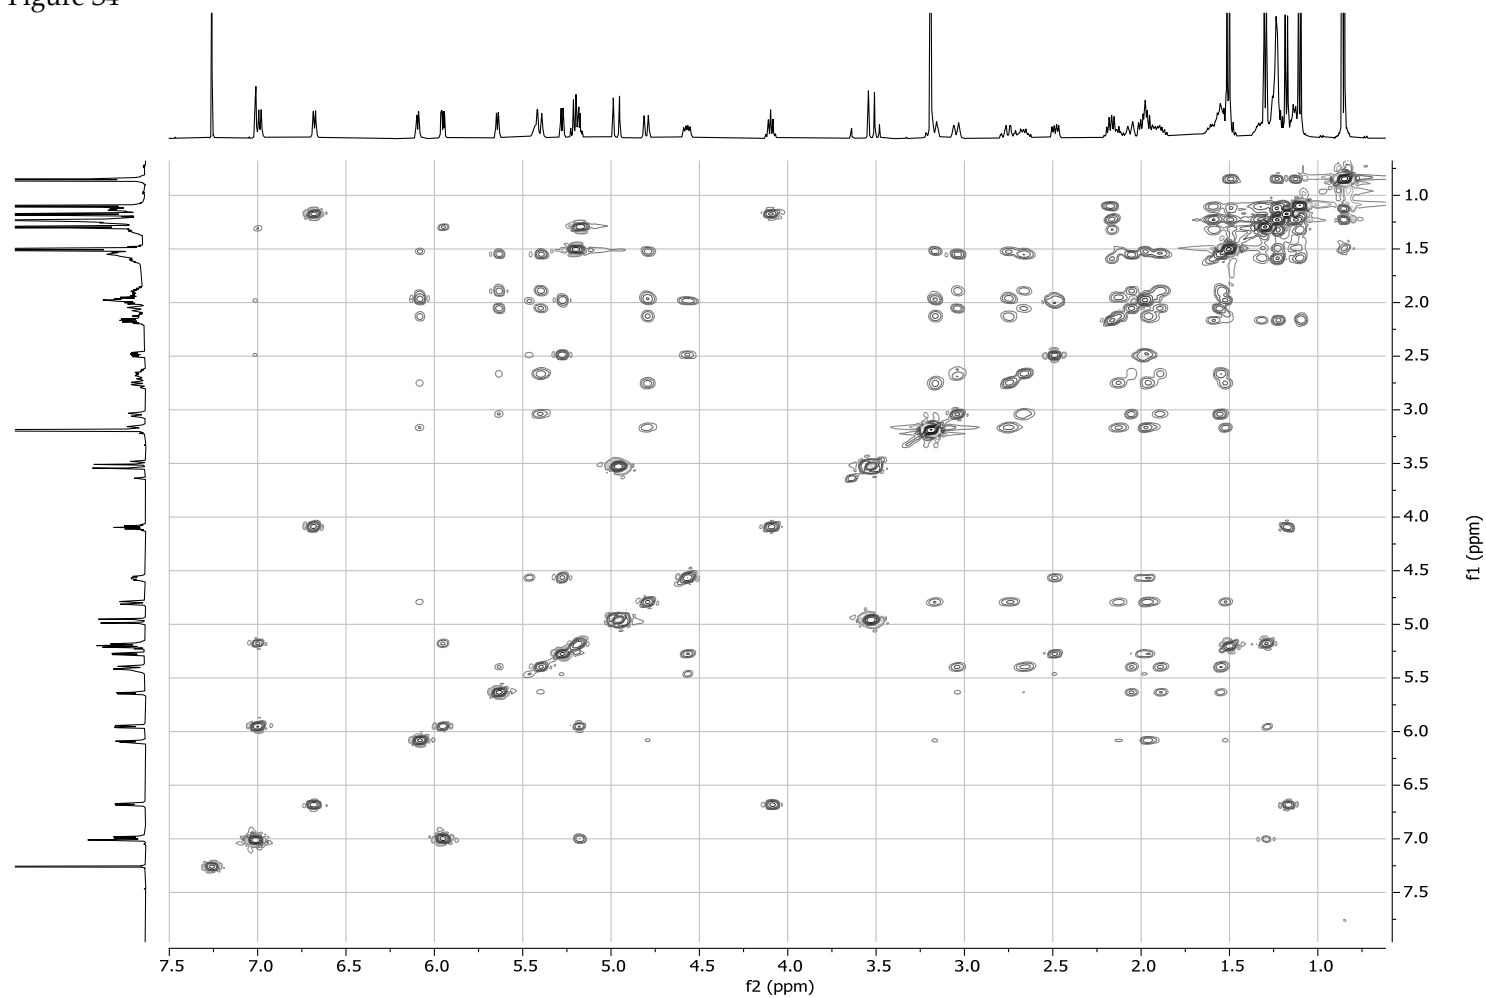

**Figure S4.** TOCSY (500 MHz) Spectrum of Compound **1** in  $\text{CDCl}_3$

Figure S5

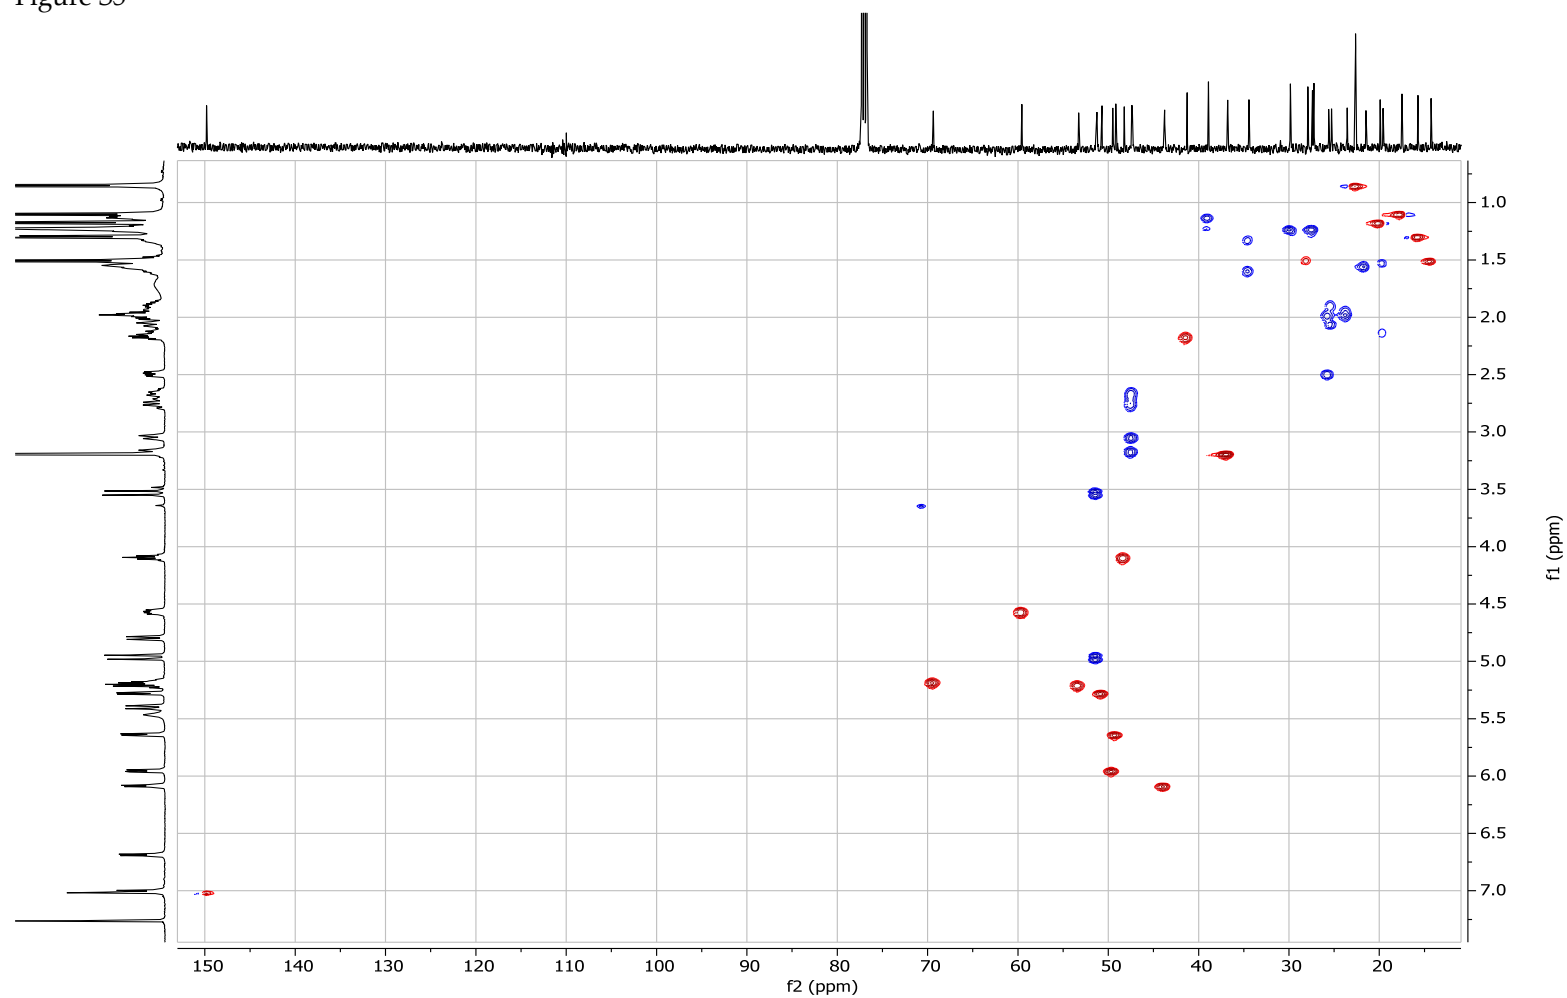

Figure S5. gHSQC (500 MHz) Spectrum of Compound 1 in CDCl<sub>3</sub>

Figure S6

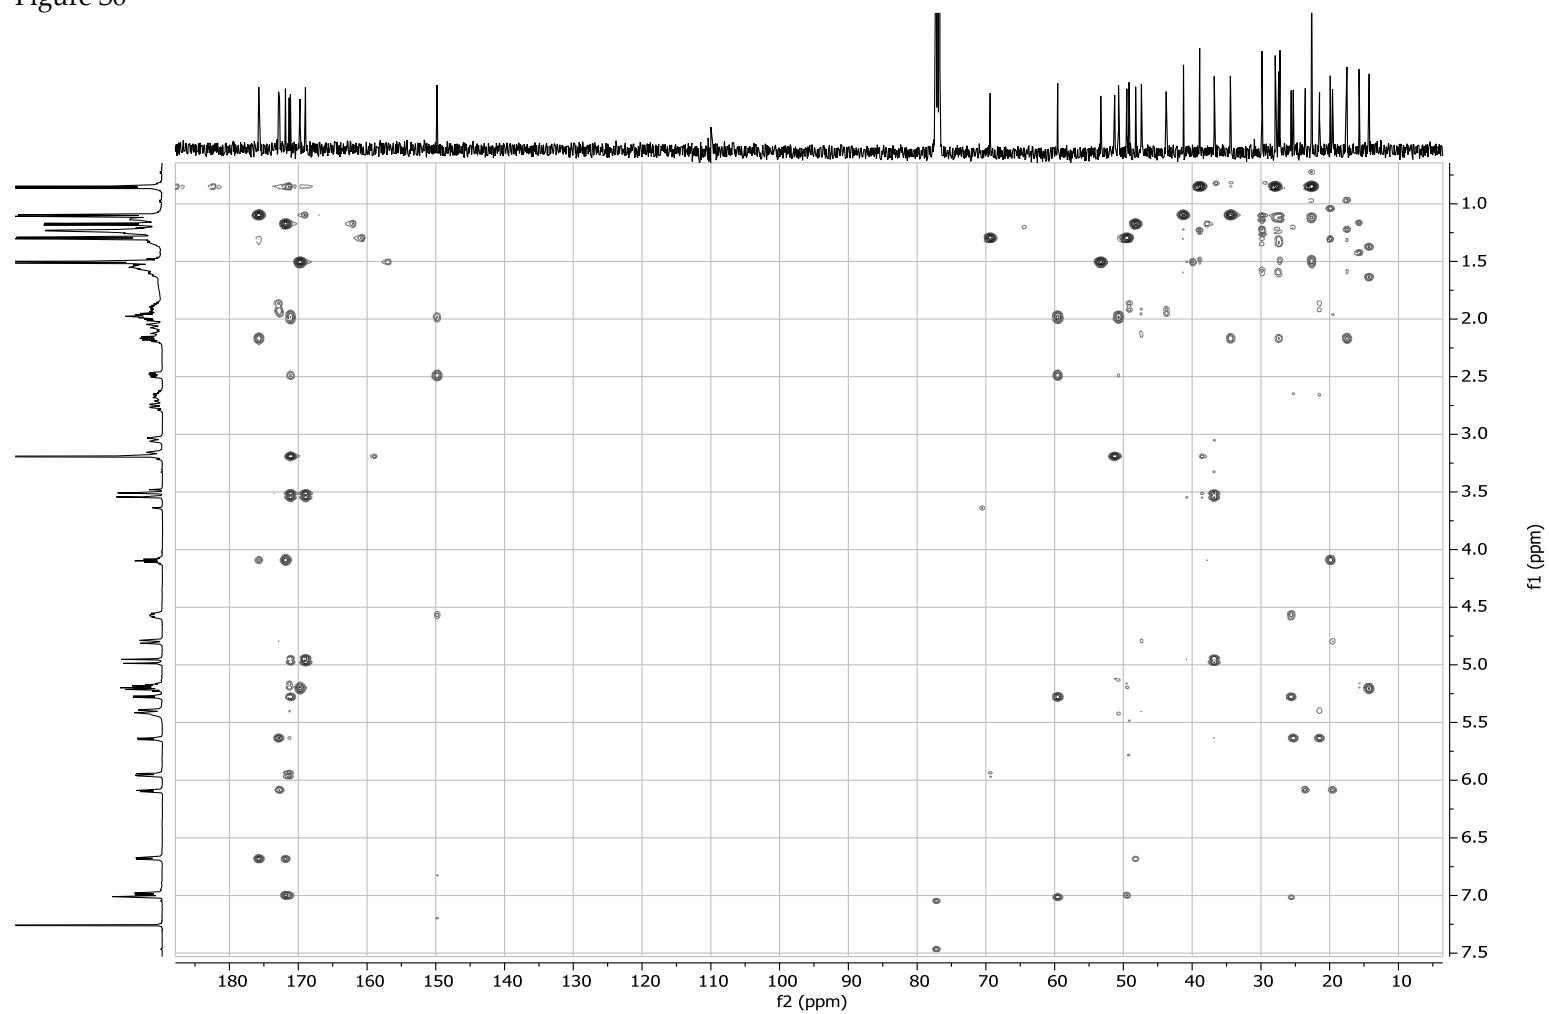

Figure S6. gHMBC (500 MHz) Spectrum of Compound **1** in  $\text{CDCl}_3$

Figure S7

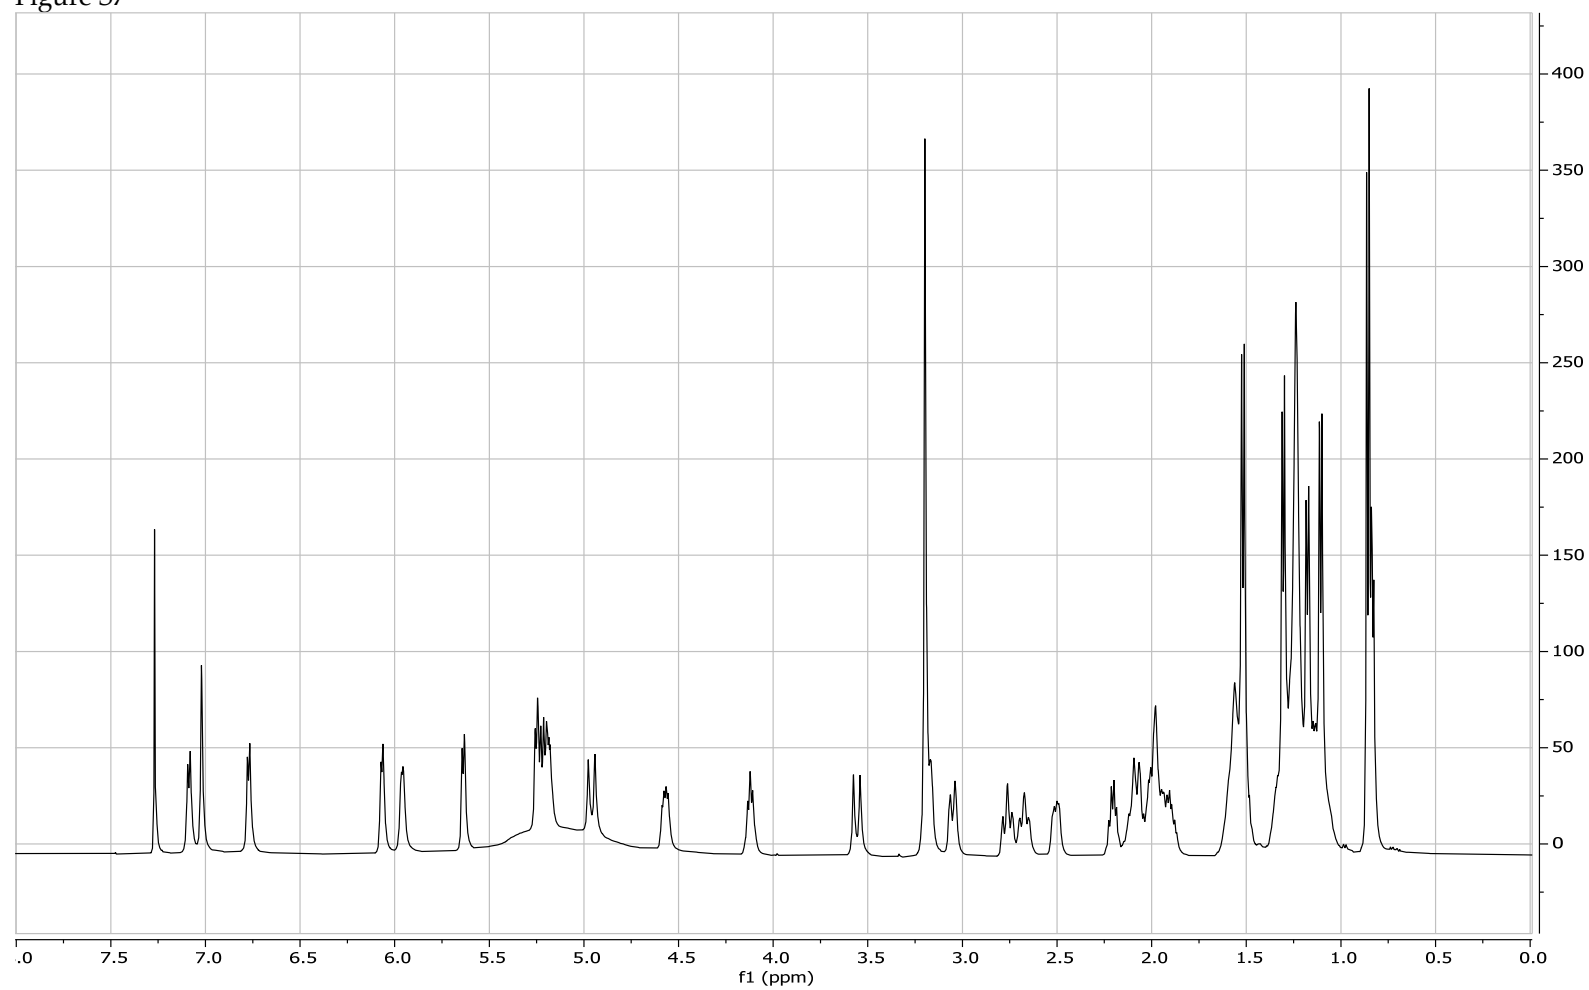

Figure S7.  $^1\text{H}$  NMR (500 MHz) Spectrum of Compound 2 (mixture of 2a 58% and 2b 42%) in  $\text{CDCl}_3$



Figure S8

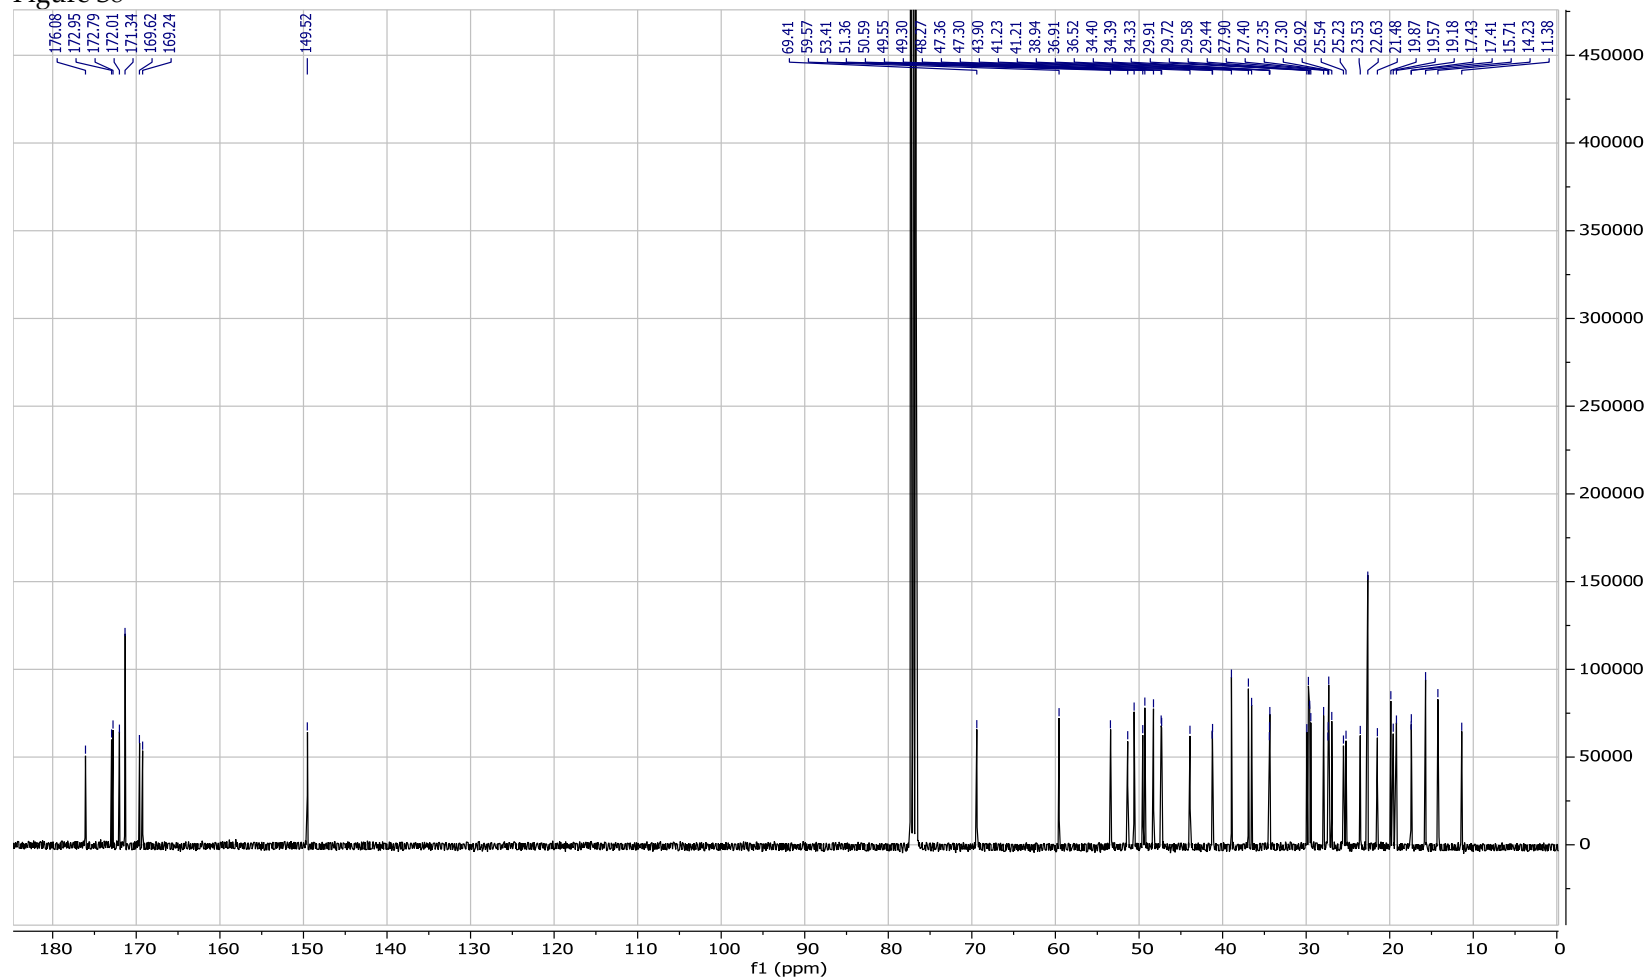

Figure S8. <sup>13</sup>C NMR (100 MHz) Spectrum of Compound 2 (mixture of 2a 58% and 2b 42%) in CDCl<sub>3</sub>

Figure S9

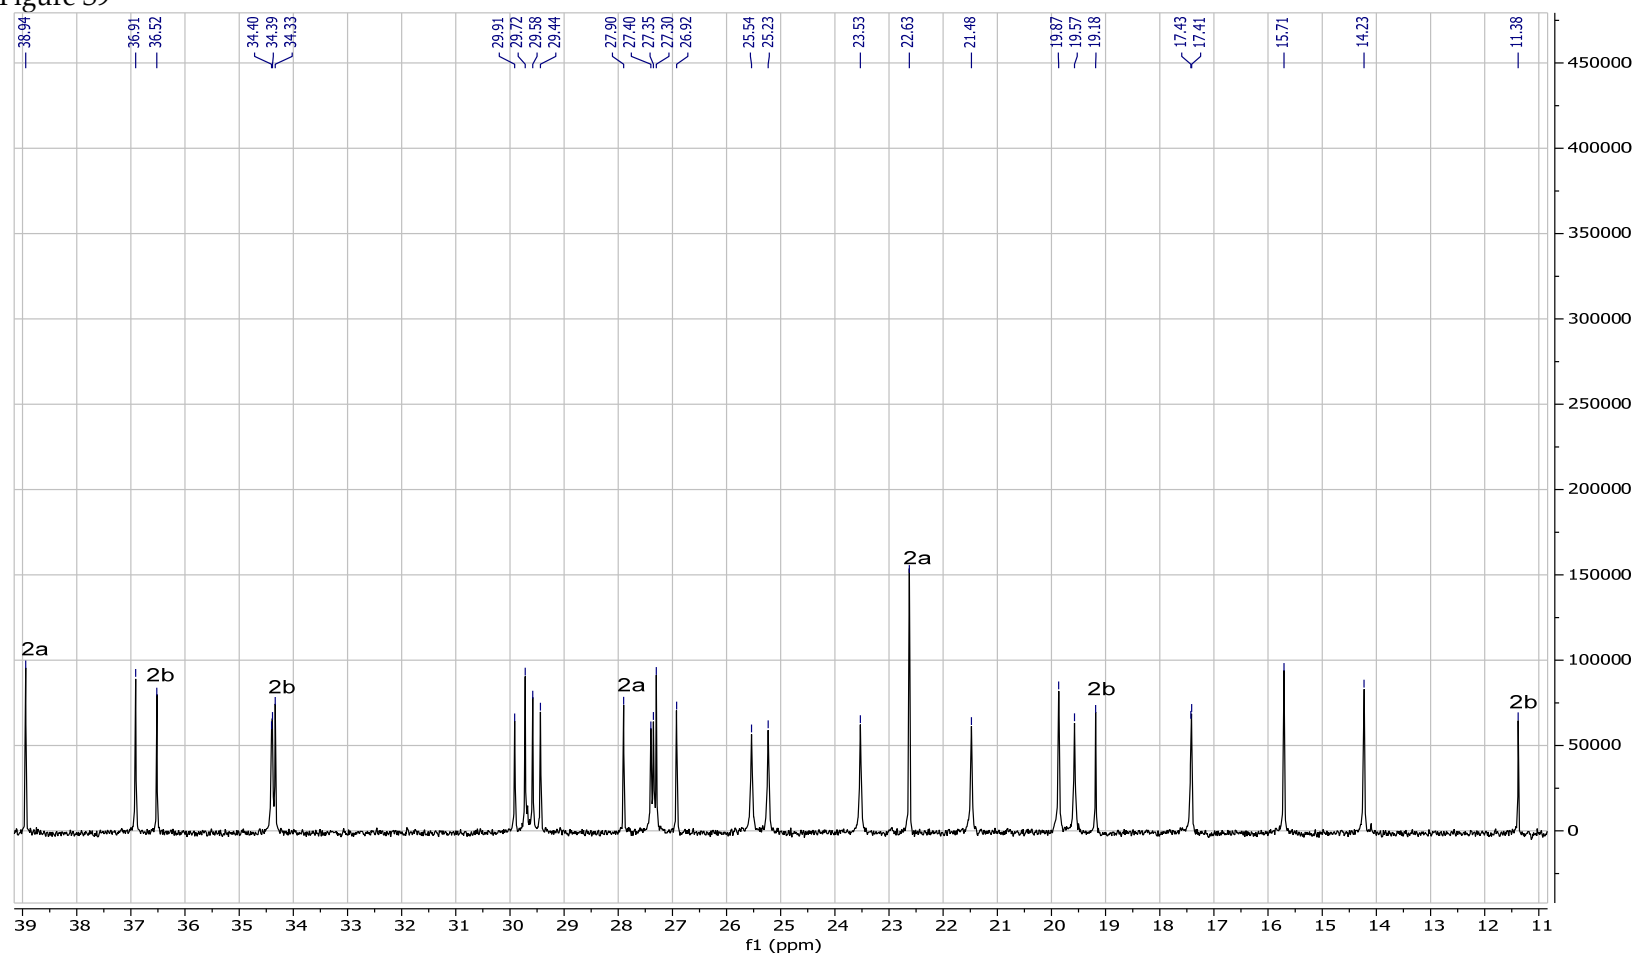

Figure S9.  $^{13}\text{C}$  NMR (100 MHz) Spectrum of Compound 2 (mixture of 2a 58% and 2b 42%) in  $\text{CDCl}_3$

Figure S10

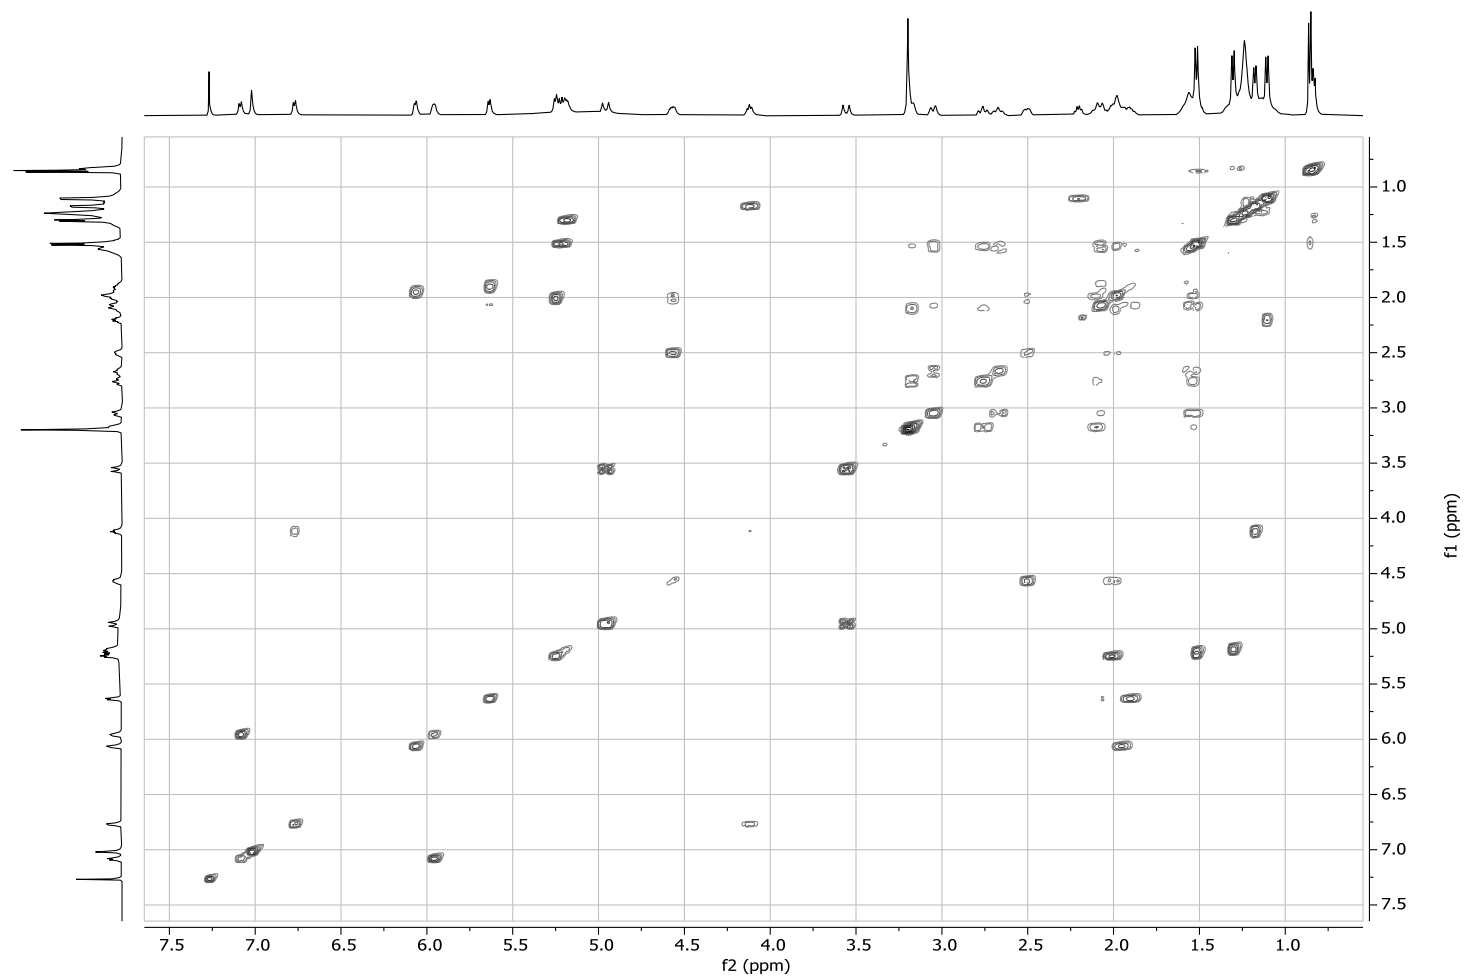

Figure S10. gCOSY (500 MHz) Spectrum Compound 2 (mixture of 2a 58% and 2b 42%) in  $\text{CDCl}_3$

Figure S11

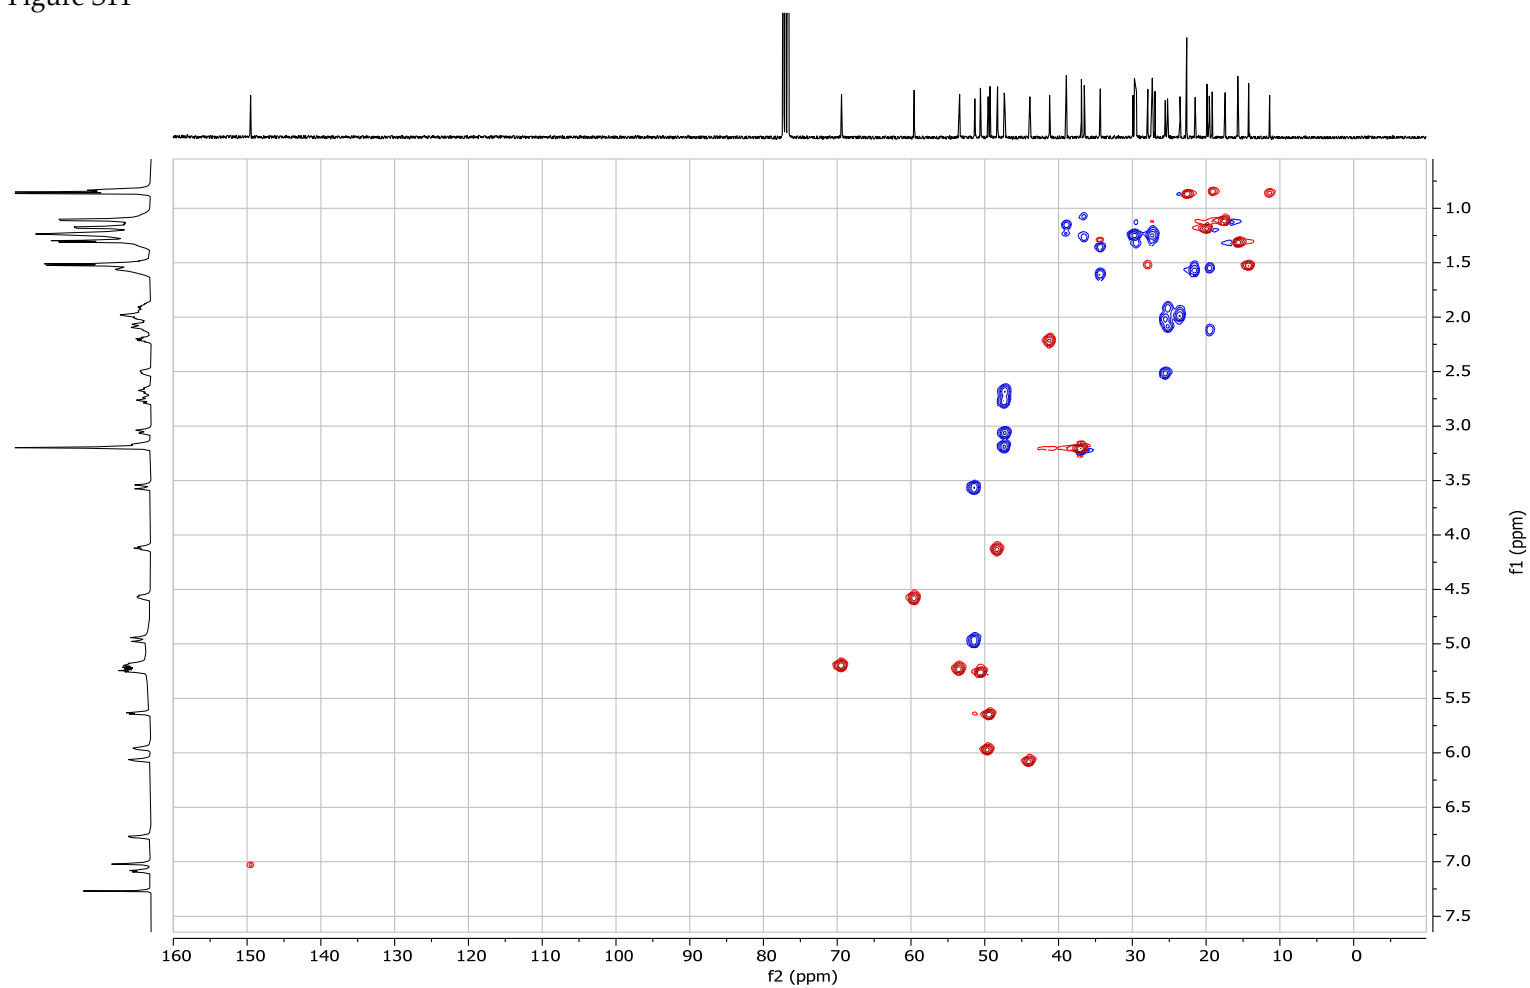

Figure S11. gHSQC (500 MHz) Spectrum of Compound 2 (mixture of 2a 58% and 2b 42%) in  $\text{CDCl}_3$

Figure S12

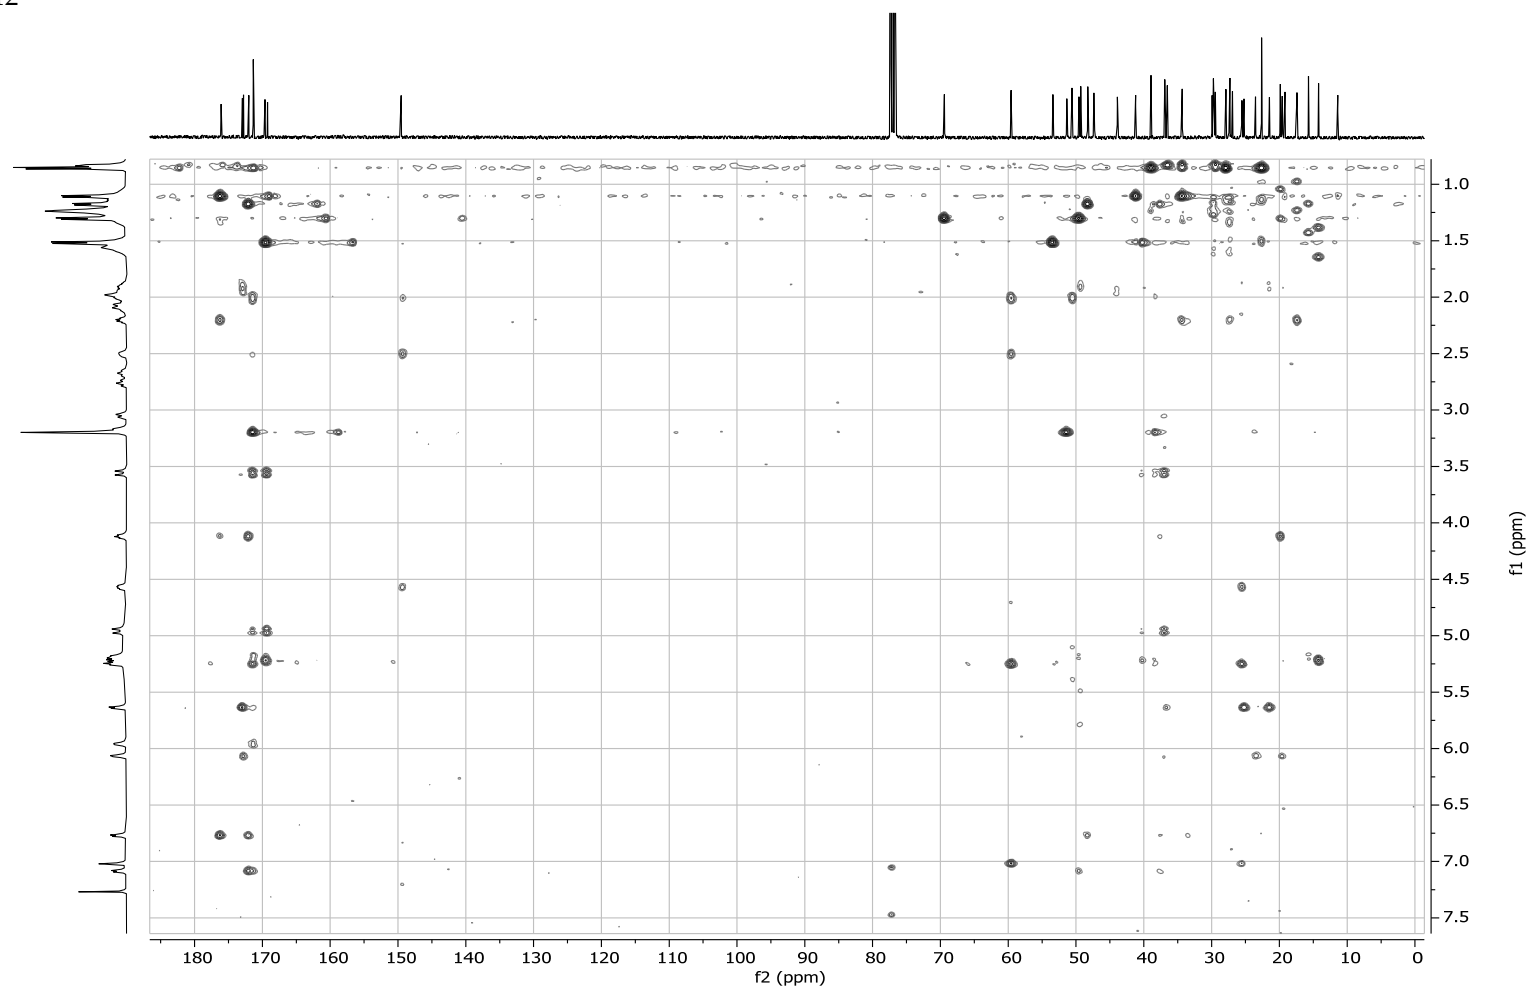

Figure S12. gHMBC (500 MHz) Spectrum of Compound 2 (mixture of 2a 58% and 2b 42%) in  $\text{CDCl}_3$

Figure S13

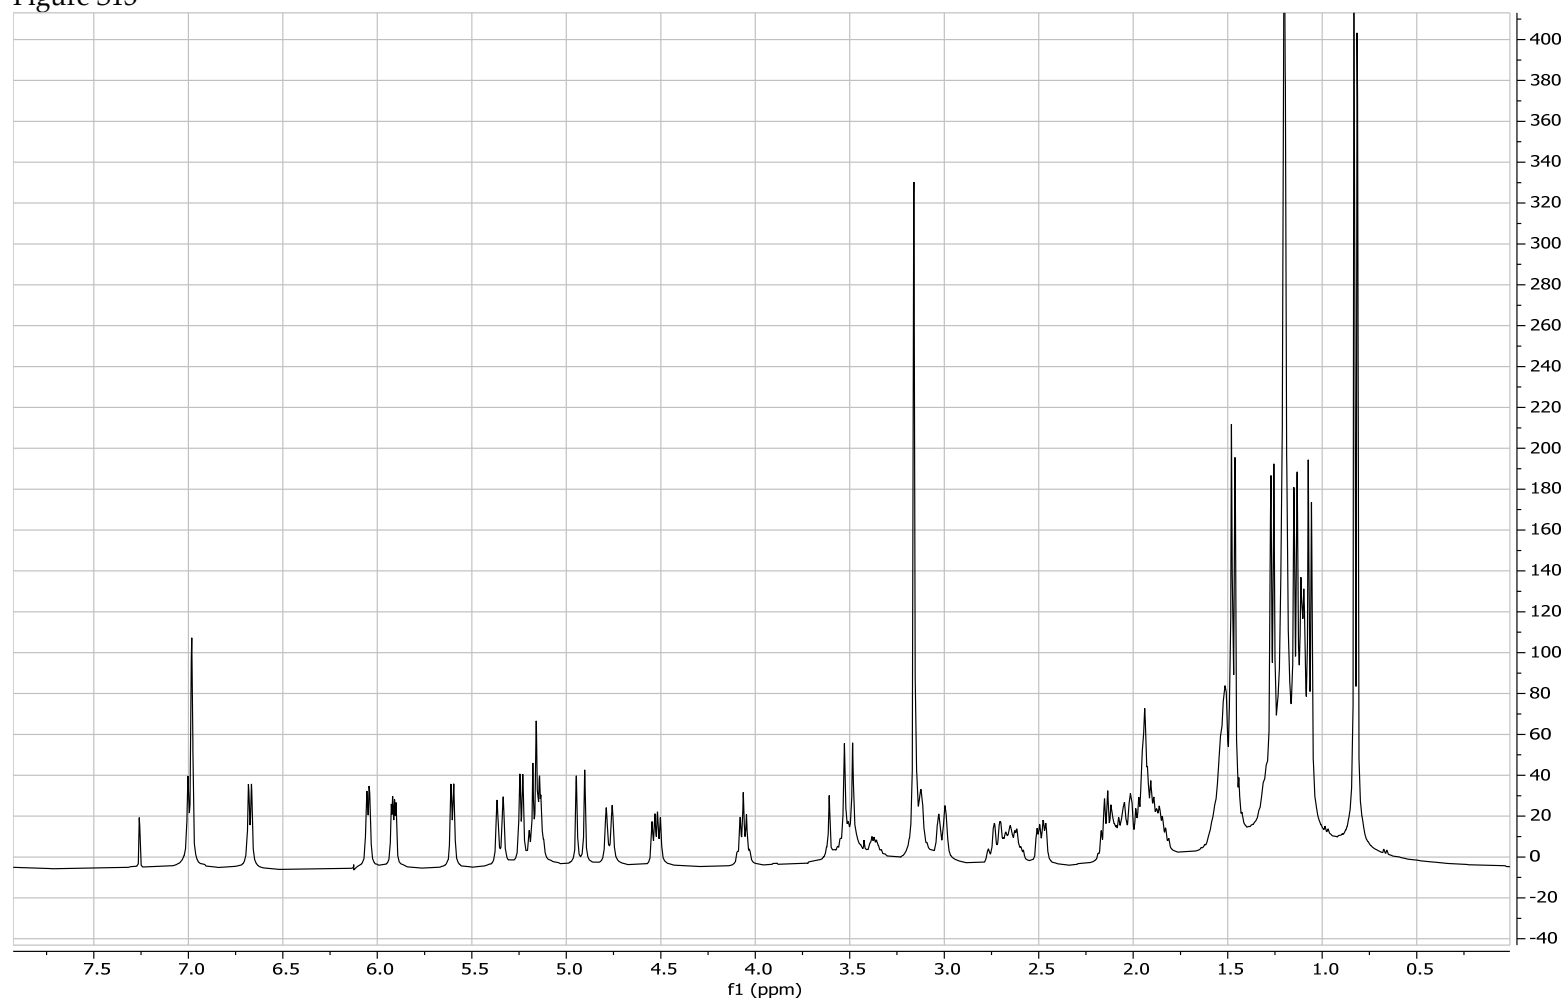

Figure S13.  $^1\text{H}$  NMR (400 MHz) Spectrum of Compound 3 in  $\text{CDCl}_3$

Figure S14

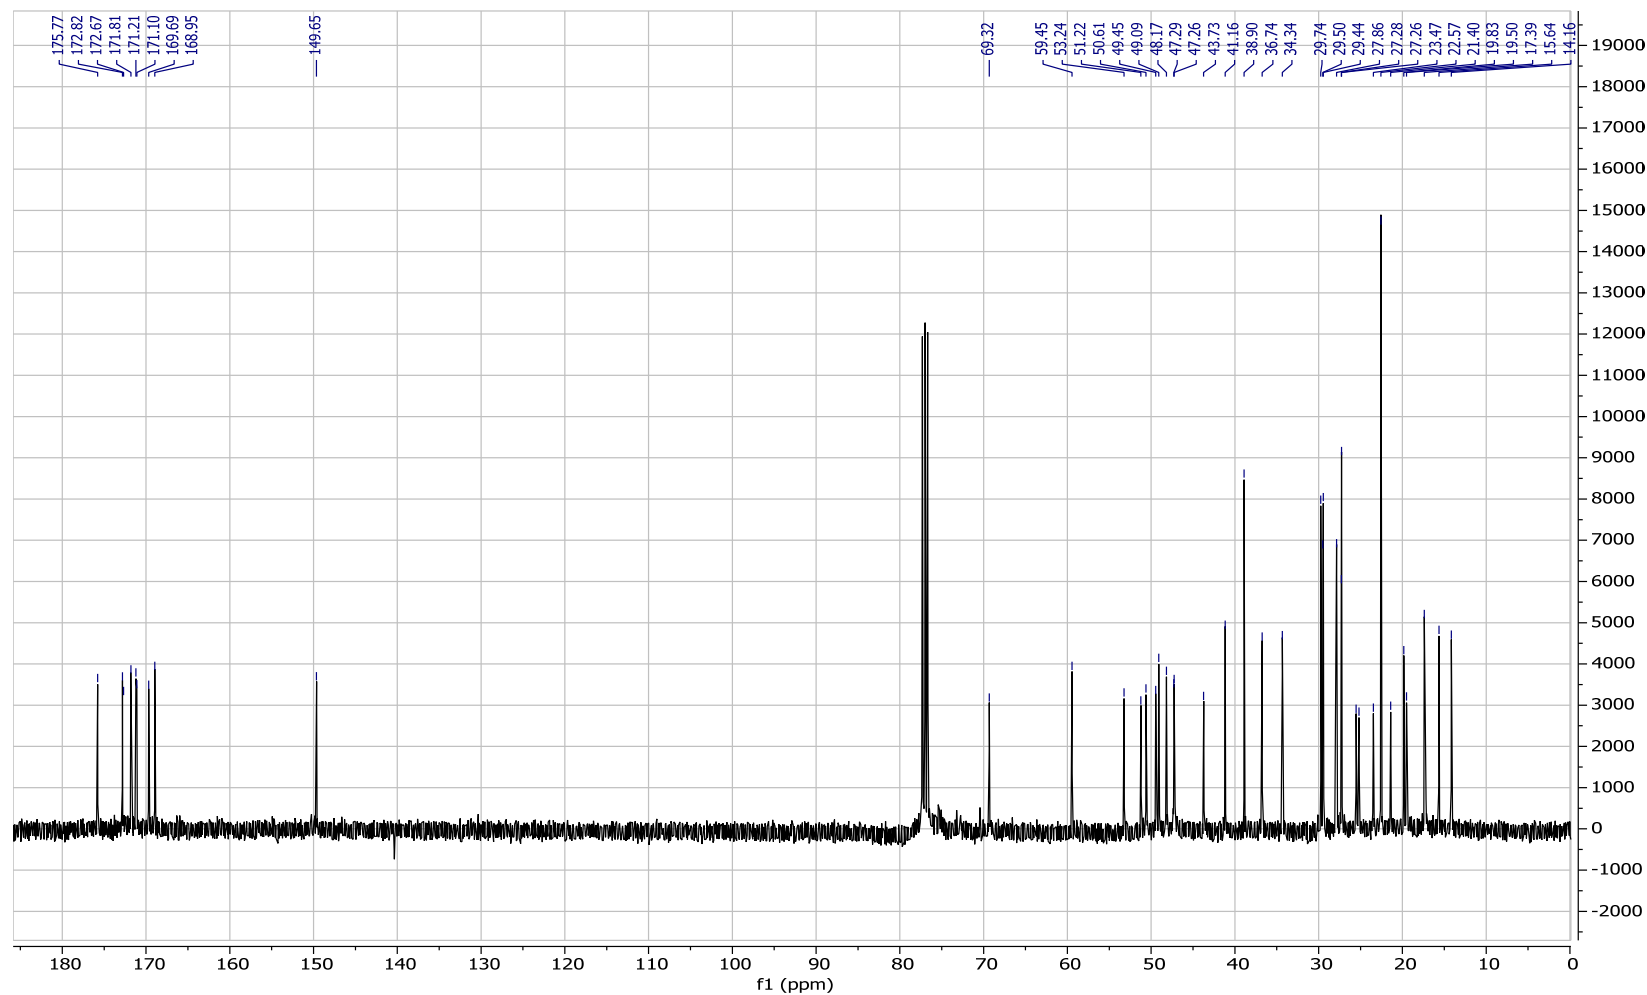

**Figure S14.**  $^{13}\text{C}$  NMR (100 MHz) Spectrum of Compound **3** in  $\text{CDCl}_3$

Figure S15

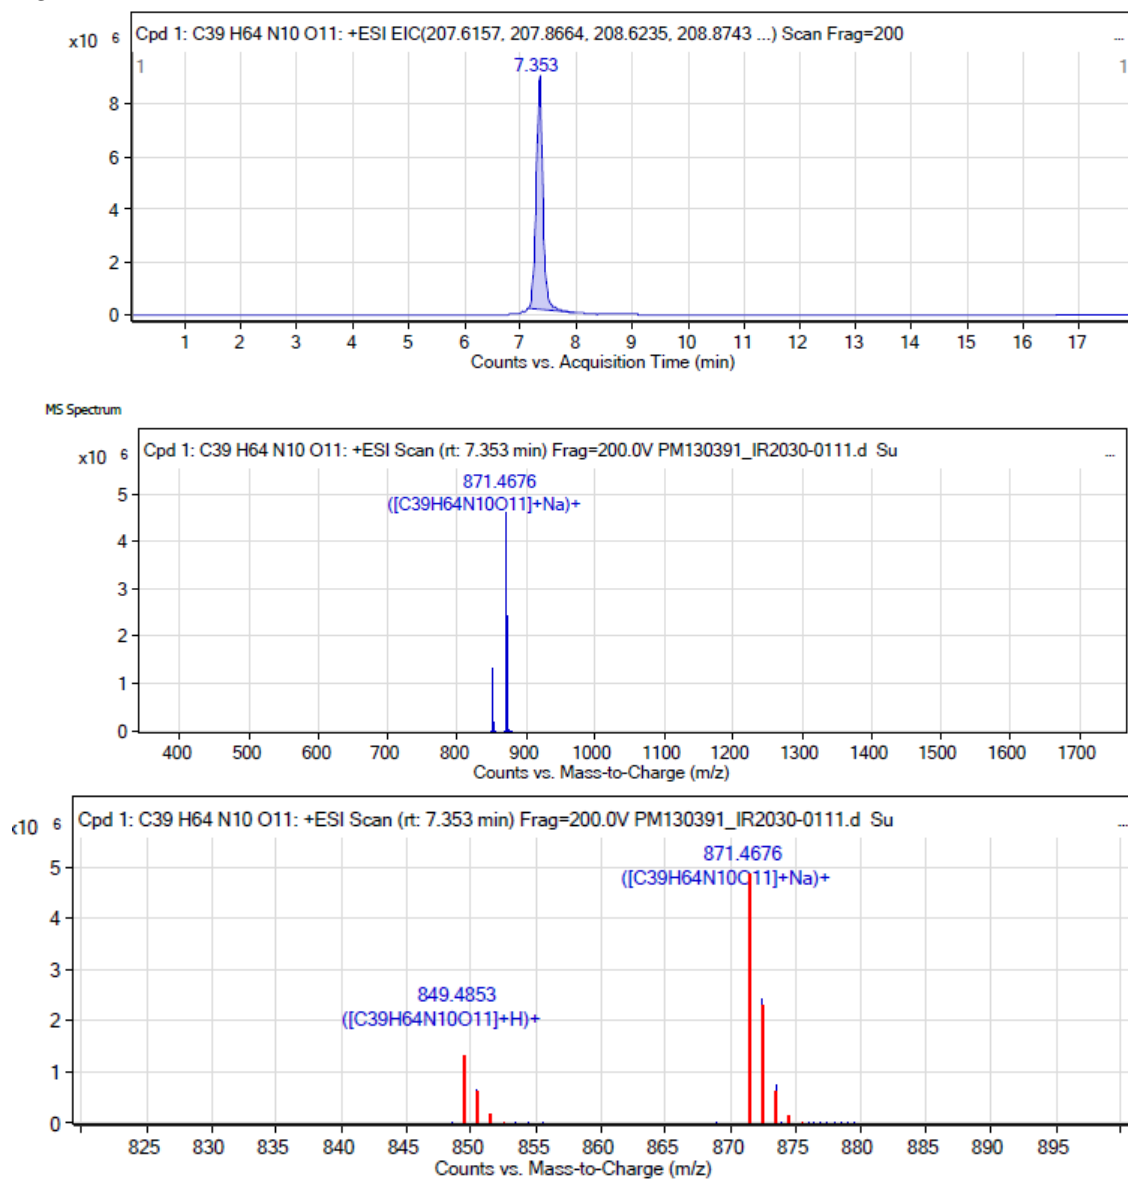

Figure S15. HRESIMS m/z 849.4853 (calcd for C<sub>39</sub>H<sub>65</sub>N<sub>10</sub>O<sub>11</sub>, 849.4829) of compound 1.



Figure S16

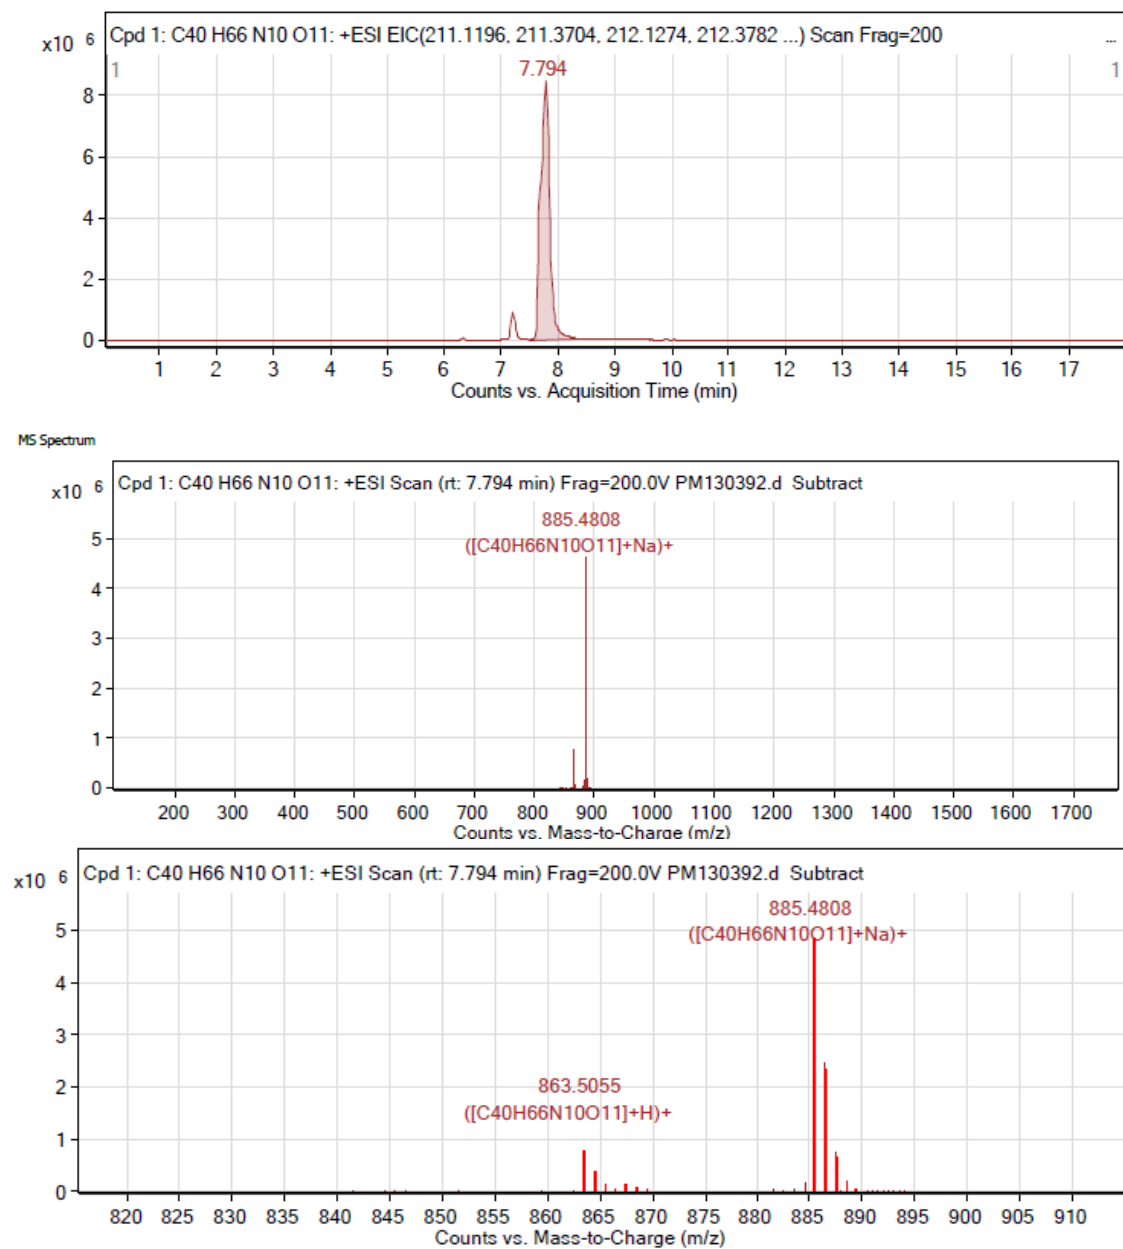

**Figure S16.** HRESIMS  $m/z$  863.5055 (calcd for C<sub>40</sub>H<sub>67</sub>N<sub>10</sub>O<sub>11</sub>, 863.4985) of compound **2**.

Figure S17

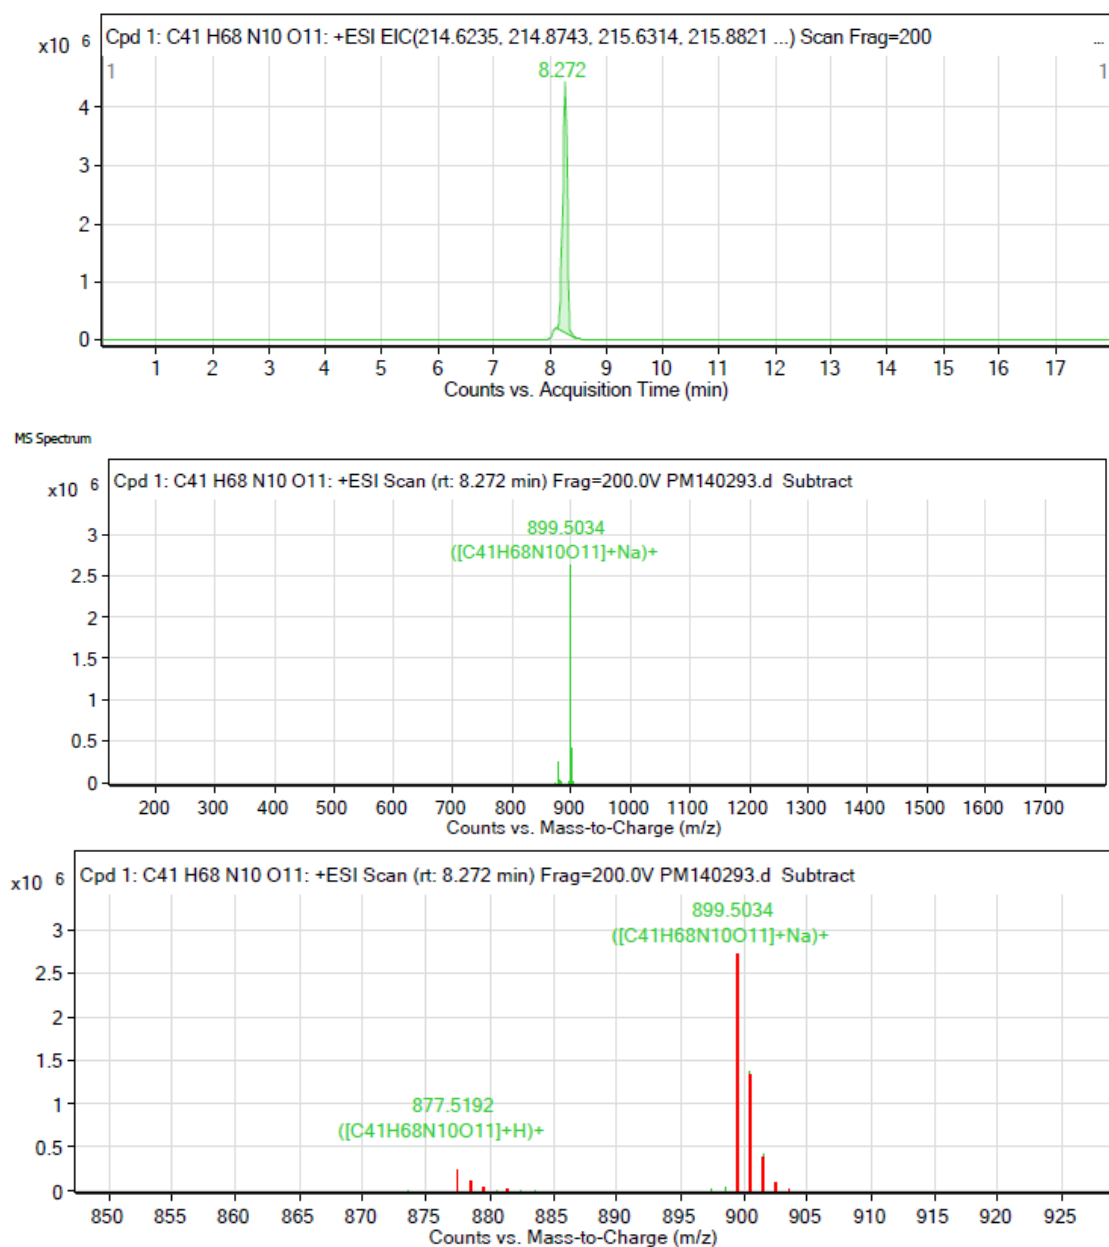

**Figure S17.** HRESIMS  $m/z$  877.5192 (calcd for  $C_{41}H_{69}N_{10}O_{11}$ , 877.5142) of compound 3.

Figure S18

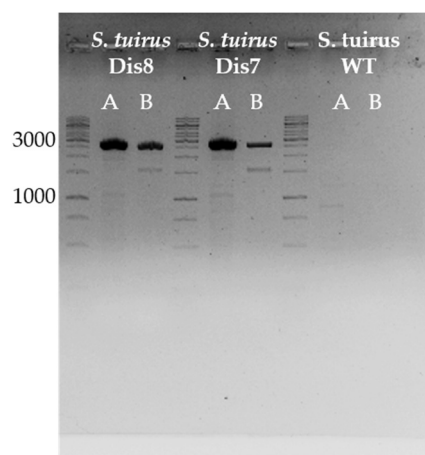

**Figure S18.** PCR check of the mutant strains. PCR was performed using primers annealing in the vector pOJ260 and in the chromosome outside the homologous region. The WT strain did not show any bands since primer pOJ260 check and M13 Fw do not anneal in the chromosome. A: PCR product obtained with primer PM13Dis down and pOJ260 check (2869 kb) B: PCR product obtained using primers PM13Dis Check-up and M13 Fw (2681). Primers sequence is listed in table 4).

Figure S19

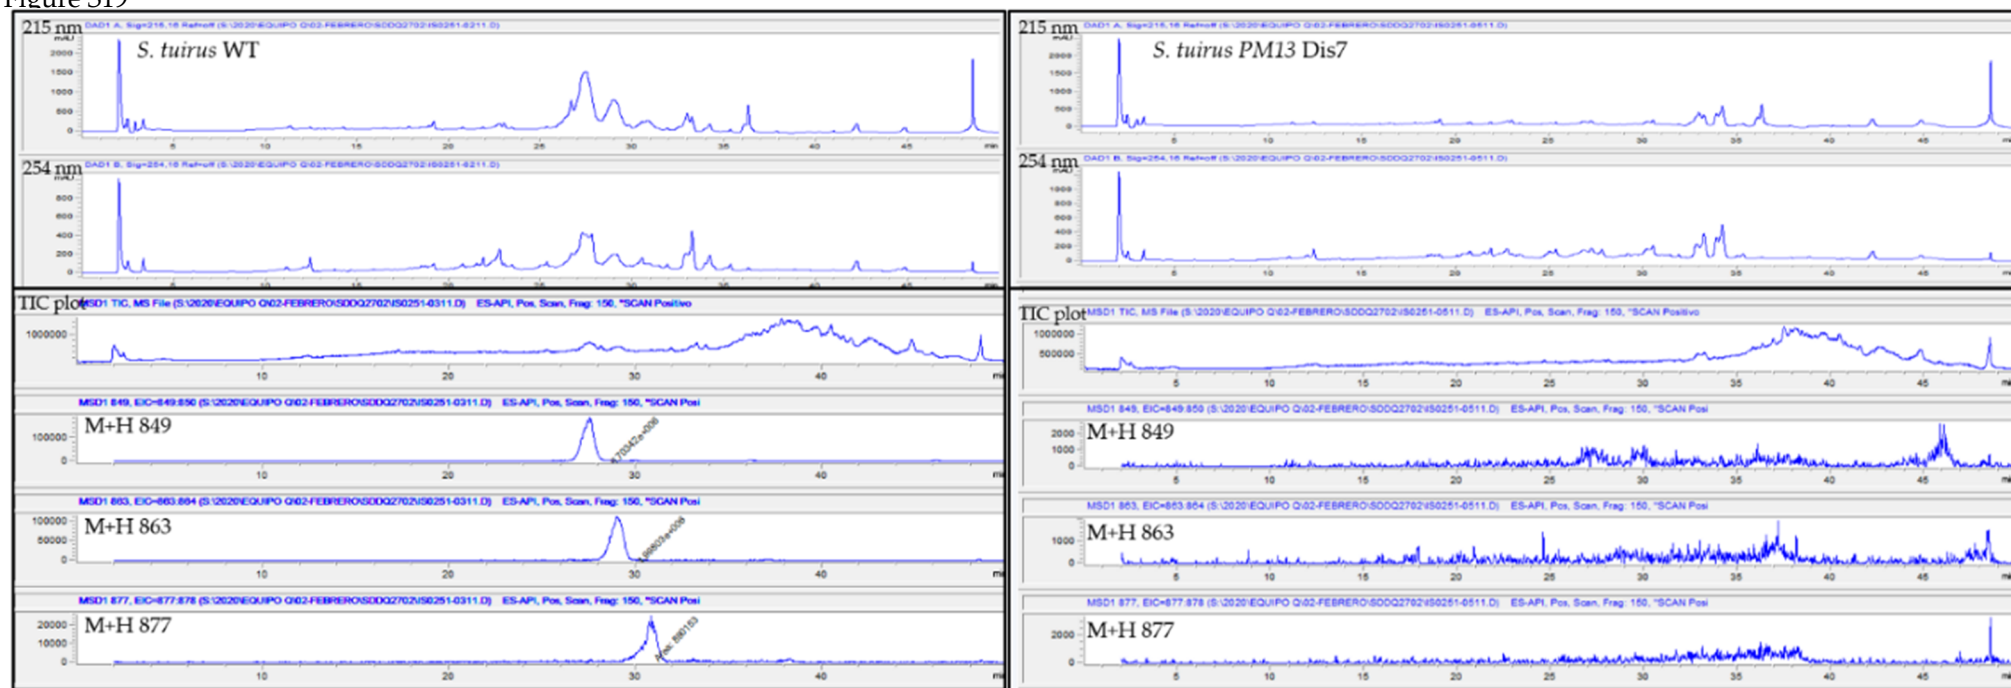

**Figure S19** HPLC-MS results from the extract of the wild type strain and *S. tuius* PM13 Dis7. The peaks corresponding to compounds 1-3 are visible in the wild type chromatogram at both 215 nm and 254 nm. However these peaks cannot be detected in the extract of *S. tuius* PM13 Dis7 strain. When extracting the ions of the masses of the three compounds (M+H 849, 863 and 877), the three of them can be observed in *S. tuius* wild type strain but they are not detected in *S. tuius* PM13 Dis7 strain.

Table S1

**Table S1.** BGCs predicted by antiSMASH. Similarity to known clusters is given by antiSMASH comparing each cluster with the MiBIG database [38,55].

| Cluster                                             | Type of BGC            | Most similar cluster predicted by antiSMASH                        |                           | Similarity |
|-----------------------------------------------------|------------------------|--------------------------------------------------------------------|---------------------------|------------|
|                                                     |                        | Known compound                                                     | Type of BGC               |            |
| Contig 1 (GenBank accession number JAGTPG010000002) |                        |                                                                    |                           |            |
| Cluster 1                                           | terpene                | phenalamide A2                                                     | NRP + Polyketide          | 50%        |
| Cluster 2                                           | melanin                | melanin                                                            | Other                     | 42%        |
| Cluster 3                                           | NRPS,T3PKS             | coelichelin                                                        | NRP                       | 72%        |
| Cluster 4                                           | NRPS-like              | Vazabotide A                                                       | NRP                       | 6%         |
| Cluster 5                                           | ectoine                | ectoine                                                            | Other                     | 100%       |
| Cluster 6                                           | T1PKS                  | rifamycin                                                          | Polyketide                | 7%         |
| Cluster 7                                           | T1PKS, lassopeptide    | Chaxapeptin                                                        | RiPP                      | 42%        |
| Cluster 8                                           | other,T3PKS,phenazine  | 5-acetyl-5,10-dihydrophenazine-1-carboxylic acid / endophenazine A | Other:Phenazine           | 100%       |
| Cluster 9                                           | NRPS,terpene           | SCO-2138                                                           | RiPP                      | 92%        |
| Cluster 10                                          | melanin                | melanin                                                            | Other                     | 100%       |
| Cluster 11                                          | siderophore            | desferrioxamin B / desferrioxamine E                               | Other                     | 66%        |
| Cluster 12                                          | T3PKS                  | germicidin                                                         | Other                     | 100%       |
| Cluster 13                                          | PKS-like,butyrolactone | coelimycin P1                                                      | Polyketide:Modular type I | 12%        |
| Cluster 14                                          | NRPS                   | diisonitrile antibiotic SF2768                                     | NRP                       | 66%        |
| Cluster 15                                          | lanthipeptide-Class I  |                                                                    |                           |            |
| Cluster 16                                          | linaridin              | legonaridin                                                        | RiPP                      | 66%        |
| Cluster 17                                          | NRPS                   | phosphonoglycans                                                   | Saccharide                | 3%         |
| Cluster 18                                          | amglyccycl             | acarbose                                                           | Saccharide                | 7%         |
| Contig 2 (GenBank accession number JAGTPG010000001) |                        |                                                                    |                           |            |
| Cluster 1                                           | NRPS,other             | himastatin                                                         | NRP                       | 36%        |
| Cluster 2                                           | terpene                | hopene                                                             | Terpene                   | 53%        |
| Cluster 3                                           | hglE-KS                | kanamycin                                                          | Saccharide                | 2%         |
| Cluster 4                                           | siderophore            |                                                                    |                           |            |
| Cluster 5                                           | terpene                | geosmin                                                            | Terpene                   | 100%       |
| Cluster 6                                           | RiPP-like              |                                                                    |                           |            |
| Cluster 7                                           | ectoine                | ectoine                                                            | Other                     | 75%        |
| Cluster 8                                           | siderophore            |                                                                    |                           |            |
| Cluster 9                                           | T2PKS                  | spore pigment                                                      | Polyketide                | 58%        |

Table S2

**Table S2.** Genes predicted in PM130391, 130392, and 140293 biosynthetic gene cluster and predicted function of the encoded enzymes.

| Gene code       | Predicted enzyme activity                                                   |
|-----------------|-----------------------------------------------------------------------------|
| 1- KEF29_00490  | VOC family protein                                                          |
| 2- KEF29_00495  | TetR                                                                        |
| 3- KEF29_00500  | MMPL family transporter                                                     |
| 4- KEF29_00505  | ABC transporter permease                                                    |
| 5- KEF29_00510  | ATP-binding cassette domain-containing protein                              |
| 6- KEF29_00515  | EXLDI protein                                                               |
| 7- KEF29_00520  | Amidinotransferase                                                          |
| 8- KEF29_00525  | Cytochrome P450                                                             |
| 9- KEF29_00530  | Cytochrome P450                                                             |
| 10- KEF29_00535 | Cytochrome P450                                                             |
| 11- KEF29_00540 | NRPS: A                                                                     |
| 12- KEF29_00545 | Hypothetical protein                                                        |
| 13- KEF29_00550 | Mycofactocin-coupled SDR family oxidoreductase                              |
| 14- KEF29_00555 | NRPS: TE                                                                    |
| 15- KEF29_00560 | MbtH family protein                                                         |
| 16- KEF29_00565 | KtzI L-ornithine N(5)-oxygenase                                             |
| 17- KEF29_00570 | NRPS: C-A-T-TE                                                              |
| 18- KEF29_00575 | NRPS: A-NMT-T                                                               |
| 19- KEF29_00580 | E-TIGR01720-C                                                               |
| 20- KEF29_00585 | NRPS: A                                                                     |
| 21- KEF29_00590 | NRPS: C                                                                     |
| 22- KEF29_00600 | NRPS: A                                                                     |
| 23- KEF29_00605 | NRPS: C                                                                     |
| 24- KEF29_00610 | NRPS: C                                                                     |
| 25- KEF29_00615 | NRPS: C-A-T-E-E                                                             |
| 26- KEF29_00620 | PKS: AT                                                                     |
| 27- KEF29_00625 | PKS: TE                                                                     |
| 28- KEF29_00630 | PKS: KS (Iterative)                                                         |
| 29- KEF29_00635 | LmbU Transcriptional regulator                                              |
| 30- KEF29_00640 | KtzT Piperazic acid synthase/FMN-binding negative transcriptional regulator |
| 31- KEF29_00645 | NRPS: C*                                                                    |
| 32- KEF29_00650 | Hypothetical protein                                                        |
| 33- KEF29_00655 | NRPS: A                                                                     |
| 34- KEF29_00660 | NRPS: T-E-E                                                                 |
| 35- KEF29_00665 | NRPS: C                                                                     |
| 36- KEF29_00670 | NRPS: T                                                                     |
| 37- KEF29_00675 | Halogenase                                                                  |
| 38-KEF29_00680  | DUF1707 domain-containing protein                                           |
| 39- KEF29_00685 | Transporter                                                                 |
| 40- KEF29_00690 | Hopanoid C-3 methylase                                                      |
| 41- KEF29_00695 | Hypothetical protein                                                        |

|                 |                                             |
|-----------------|---------------------------------------------|
| 42- KEF29_00700 | Aquaporin family protein                    |
| 43- KEF29_00705 | Hypothetical protein                        |
| 44- KEF29_00710 | Methyltransferase domain-containing protein |

## References

55. Blin, K.; Shaw, S.; Steinke, K.; Villebro, R.; Ziemert, N.; Lee, S.Y.; Medema, M.H.; Weber, T. antiSMASH 5.0: updates to the secondary metabolite genome mining pipeline. *Nucleic Acids Res* **2019**, *47*, W81-W87.
56. Kautsar, S.A.; Blin, K.; Shaw, S.; Navarro-Munoz, J.C.; Terlouw, B.R.; van der Hooft, J.J.J.; van Santen, J.A.; Tracanna, V.; Suarez Duran, H.G.; Pascal Andreu, V.; Selem-Mojica, N.; Alanjary, M.; Robinson, S.L.; Lund, G.; Epstein, S.C.; Sisto, A.C.; Charkoudian, L.K.; Collemare, J.; Linington, R.G.; Weber, T.; Medema, M.H. MIBiG 2.0: a repository for biosynthetic gene clusters of known function. *Nucleic Acids Res* **2020**, *48*, D454-D458.
